# Supplementary material
Source: MDPI journal article supplement (https://www.mdpi.com/1999-4907/10/8/679)
Supplement: s1 [file s1]

## Electronic Supplementary Material 2. Inputs data for assessing suppression costs

We calculated the suppression costs for each large fire based on agencies prices (Andalusia Regional Government). Total suppression costs included control fire-fighting operations both aerial and ground resources. However, crew travel cost and liquidating cost were not incorporated in the control fire costs.

Table S2-1. Resources considered by suppression costs approach

| Resource                                                                        | Cost (€/h) |
|---------------------------------------------------------------------------------|------------|
| <i>Wildfire-trained crew (6 people)</i>                                         | 120.93     |
| <i>Wildfire-trained crew (11 people)</i>                                        | 217.49     |
| <i>Wildfire crew (3 people)</i>                                                 | 49.12      |
| <i>Fire operations technician</i>                                               | 30.26      |
| <i>Forester</i>                                                                 | 20.59      |
| <i>Driver</i>                                                                   | 14.73      |
| <i>4 x 4 vehicle</i>                                                            | 7.54       |
| <i>Bulldozer</i>                                                                | 73.20      |
| <i>Forest fire tank pumper (3,000-4,000 l)</i>                                  | 70.86      |
| <i>Forest fire tank pumper (9,000-11,000 l)</i>                                 | 94.52      |
| <i>Mobile meteorological and communications unit</i>                            | 42.54      |
| <i>Mobile large fire analysis unit</i>                                          | 72.51      |
| <i>Agricultural aircraft (AT802/AT802 FB,...)</i>                               | 653.20     |
| <i>Agricultural aircraft (AT502/PZL,...)</i>                                    | 653.20     |
| <i>Coordination and vigilance airplane (C-337G,...)</i>                         | 439.00     |
| <i>Transfer and extinguishing helicopter (14 people)</i>                        | 1,830.00   |
| <i>Transfer and extinguishing helicopter (BELL 415/BELL212/A-119 KOALA,...)</i> | 1,830.00   |
| <i>Water bomber helicopter (Kamov K-32A 11 BC,...)</i>                          | 2100.80    |
| <i>Amphibious aircraft</i>                                                      | 5,245.28   |
