# Supplementary material
Source: MDPI journal article supplement (https://www.mdpi.com/1999-4907/10/8/679)
Supplement: s1 [file s1]

**Electronic Supplementary Material 3. Potential effects on flame length**

As some examples, we included the spread rate and flame length from 150 random points in the Cordoba province under current and S1 scenarios.

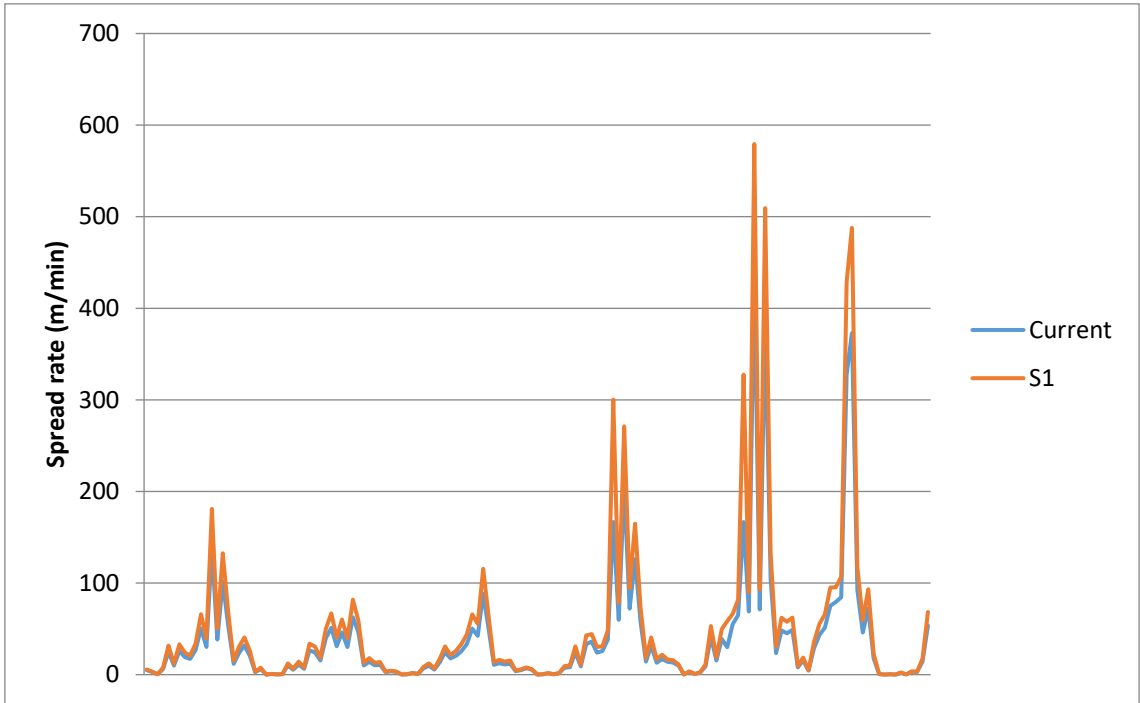

Figure S4-1. Potential effects on spread rate under current and S1 scenarios

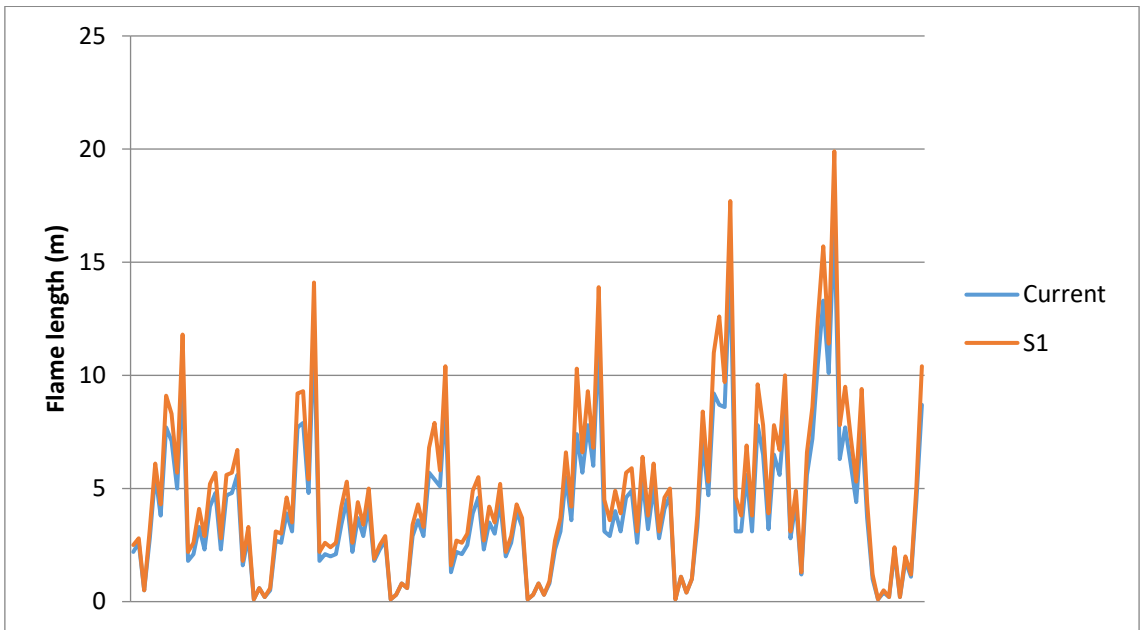

Figure S4-2. Potential effects on flame length under current and S1 scenarios
