# Supplementary material
Source: MDPI journal article supplement (https://www.mdpi.com/1999-4907/10/8/679)
Supplement: s1 [file s1]

### **Electronic Supplementary Material 3. Summer precipitation in the study area**

In our study area, the summer precipitation (from 15 June to 15 September) is very low (only between zero and three rainy days).

Table S3-1. Summer precipitation in the Córdoba province (2005-2018)

| <b>Year</b> | <b>Precipitation (mm from 15 June to 15 September)</b> |
|-------------|--------------------------------------------------------|
| 2005        | 0                                                      |
| 2006        | 4                                                      |
| 2007        | 20.8                                                   |
| 2008        | 0.2                                                    |
| 2009        | 1.6                                                    |
| 2010        | 5.7                                                    |
| 2011        | 0                                                      |
| 2012        | 0                                                      |
| 2013        | 5.2                                                    |
| 2014        | 15.4                                                   |
| 2015        | 0                                                      |
| 2016        | 0.2                                                    |
| 2017        | 9.4                                                    |
| 2018        | 0                                                      |
