# Supplementary material
Source: MDPI journal article supplement (https://www.mdpi.com/1999-4907/10/8/679)
Supplement: s1 [file s1]

Archive with 4 entries (4 files):
- Electronic Supplementary Material 1.pdf
- Electronic Supplementary Material 2.pdf
- Electronic Supplementary Material 3.pdf
- Electronic Supplementary Material 4.pdf
